# Supplementary material for: Improved diagnostic accuracy of malignant neck lumps by a simple BMVC staining assay
Source: Royal Society of Chemistry journal article supplement (doi:10.1039/b814417f), 2009-01-01
Supplement: b814417f.pdf [file b814417f.pdf]

**A simple combinational assay of fine needle aspirates for much improving  
diagnostic accuracy of malignant neck lumps**

Li-Jen Liao,<sup>1,2</sup> Chi-Chih Kang,<sup>3,4</sup> I-Shiow Jan,<sup>5</sup> Huei-Chin Chen,<sup>1</sup> Chiung-Lin Wang,<sup>3</sup>  
Pei-Jen Lou,<sup>1,\*</sup> Ta-Chau Chang,<sup>3,\*</sup>

**Supplementary 1.** Diagnosis of 42 malignant neck masses and results of FNA  
cytology and BMVC test

|                                      | No | %      | FNAC(+)   | FNAC(-)  | BMVC(+)   | BMVC(-)  |
|--------------------------------------|----|--------|-----------|----------|-----------|----------|
| Oral cavity/<br>Oropharyngeal cancer | 9  | 21.4%  | 8         | 0        | 8         | 1        |
| Hypopharyngeal/<br>Laryngeal cancer  | 5  | 11.9%  | 3         | 0        | 4         | 0        |
| Nasopharyngeal<br>Carcinoma          | 8  | 19.0%  | 7         | 0        | 4         | 1        |
| Lymphoma                             | 9  | 21.4%  | 3         | 4        | 9         | 0        |
| Parotid cancer                       | 2  | 4.8%   | 1         | 1        | 2         | 0        |
| Lung cancer                          | 4  | 9.5%   | 3         | 0        | 2         | 2        |
| Thyroid cancer                       | 2  | 4.8%   | 1         | 1        | 1         | 0        |
| Thymic cancer                        | 1  | 2.4%   | 1         | 0        | 0         | 1        |
| Unknown primary<br>Carcinoma         | 2  | 4.8%   | 1         | 1        | 2         | 0        |
| Total                                | 42 | 100.0% | 28(66.7%) | 7(16.7%) | 32(76.2%) | 5(11.9%) |

**Supplementary 2.** Diagnosis of 73 benign neck masses and results of FNA cytology and BMVC test

|                      | No | %      | FNAC(-)   | FNAC(+) | BMVC(-)   | BMVC(+)   |
|----------------------|----|--------|-----------|---------|-----------|-----------|
| Lymphoid hyperplasia | 28 | 38.4%  | 26        | 0       | 21        | 4         |
| Thyroid cyst         | 12 | 16.4%  | 12        | 0       | 9         | 2         |
| Benign thyroid tumor | 12 | 16.4%  | 9         | 0       | 5         | 4         |
| Salivary gland tumor | 10 | 13.7%  | 8         | 0       | 5         | 2         |
| Infection            | 6  | 8.2%   | 6         | 0       | 4         | 2         |
| Others               | 5  | 6.8%   | 2         | 0       | 4         | 0         |
| total                | 73 | 100.0% | 63(86.3%) | 0 (0%)  | 48(65.7%) | 14(19.2%) |
